# Supplementary material for: Assessment of formats and completeness of paper-based referral letters among urban hospitals in Rwanda: A retrospective baseline study
Source: Research Square preprint supplement (doi:10.21203/rs.3.rs-1526474/v1), 2022-04-25
Supplement: Supplementary file 1 [file 8df61193f52a533c6bc74209.xlsx]

## Sheet: External Referral form
		Additional file 1 - Sheet 1: External referral form
	EXTERNAL TRANSFER FORM			Health Falicity												Total N=307
				Referral Hospitals				Dictrict Hospital		Health Centers
				RH1 N=8		RH2 N= 89		DH1 N=7		HC3 N=64		HC1 N= 67		HC2 N=72
				Count	% within Facility	Count	% within Facility	Count	% within Facility	Count	% within Facility	Count	% within Facility	Count	% within Facility	Count	% within Facility
	Patient Identification		Client Name	8	1	89	1	7	1	64	1	67	1	72	1	307	1
			Age(DOB)	8	1	86	0.966292	7	1	64	1	65	0.970149	71	0.986111	301	0.980456
			Sex	8	1	85	0.955056	7	1	64	1	63	0.940299	71	0.986111	298	0.970684
			District	4	0.5	77	0.865169	7	1	64	1	67	1	71	0.986111	290	0.944625
			Sector	4	0.5	76	0.853933	7	1	64	1	67	1	71	0.986111	289	0.941368
			Cell	4	0.5	75	0.842697	7	1	63	0.984375	67	1	65	0.902778	281	0.915309
			Village	4	0.5	73	0.820225	7	1	64	1	67	1	16	0.222222	231	0.752443
			Sub-total														0.929269
	Transfer details	Transfer	Date and time of Admission	6	0.75	83	0.932584	7	1	63	0.984375	58	0.865672	70	0.972222	287	0.934853
			Date and Time of decision to transfer,	7	0.875	72	0.808989	7	1	56	0.875	37	0.552239	70	0.972222	249	0.811075
			Receiving Facility, Receiving Service	8	1	72	0.808989	4	0.571429	62	0.96875	35	0.522388	72	1	253	0.824104
			Calling Time	3	0.375	5	0.0561798	1	0.142857	0	0	5	0.0746269	6	0.0833333	20	0.0651466
			Staff contacted at receiving facility	3	0.375	6	0.0674157	1	0.142857	0	0	9	0.134328	0	0	19	0.0618893
			Phone	3	0.375	6	0.0674157	1	0.142857	0	0	7	0.104478	0	0	17	0.0553746
		Type of transfer	Emergency	1	0.125	66	0.741573	7	1	58	0.90625	57	0.850746	10	0.138889	199	0.648208
			Not- Emergency	0	0	66	0.741573	7	1	58	0.90625	57	0.850746	10	0.138889	198	0.644951
			Follow up	0	0	66	0.741573	7	1	58	0.90625	57	0.850746	11	0.152778	199	0.648208
		Transfer emergency	Time ambulance called	0	0	2	0.0224719	1	0.142857	2	0.03125	2	0.0298507	3	0.0416667	10	0.0325733
			Time of departure from referring facility	0	0	2	0.0224719	1	0.142857	2	0.03125	2	0.0298507	1	0.0138889	8	0.0260586
		Type of Transportation	Ambulance	4	0.5	65	0.730337	6	0.857143	2	0.03125	50	0.746269	4	0.0555556	131	0.42671
			Other (specify)	4	0.5	65	0.730337	6	0.857143	4	0.0625	50	0.746269	4	0.0555556	133	0.433225
		Health insurance	CBHI Mutuelle	8	1	60	0.674157	6	0.857143	59	0.921875	65	0.970149	69	0.958333	267	0.869707
			RSSB	8	1	60	0.674157	6	0.857143	59	0.921875	65	0.970149	69	0.958333	267	0.869707
			MMI	8	1	60	0.674157	6	0.857143	59	0.921875	65	0.970149	69	0.958333	267	0.869707
			Other (specify)	8	1	60	0.674157	6	0.857143	59	0.921875	65	0.970149	69	0.958333	267	0.869707
			None	8	1	60	0.674157	6	0.857143	59	0.921875	65	0.970149	69	0.958333	267	0.869707
			Sub-total														0.553384
	Clinical Information		Reason for Transfer	7	0.875	85	0.955056	7	1	64	1	67	1	71	0.986111	301	0.980456
			Significant Findings - Clinical Presentation	7	0.875	82	0.921348	7	1	63	0.984375	62	0.925373	72	1	293	0.954397
			If person with disability, record the type of disability	0	0	3	0.0337079	0	0	1	0.015625	1	0.0149254	0	0	5	0.0162866
			Laboratory	3	0.375	13	0.146067	2	0.285714	8	0.125	2	0.0298507	7	0.0972222	35	0.114007
			Others	6	0.75	10	0.11236	0	0	1	0.015625	3	0.0447761	0	0	20	0.0651466
			Diagnosis	8	1	54	0.606742	5	0.714286	33	0.515625	28	0.41791	61	0.847222	189	0.615635
			Procedures and Treatments	7	0.875	21	0.235955	5	0.714286	13	0.203125	13	0.19403	50	0.694444	109	0.355049
			Sub-total														0.442997
	Vital signs		To	4	0.5	48	0.539326	5	0.714286	55	0.859375	41	0.61194	25	0.347222	178	0.579805
			SpO2	4	0.5	24	0.269663	1	0.142857	5	0.078125	1	0.0149254	3	0.0416667	38	0.123779
			RR	3	0.375	40	0.449438	5	0.714286	47	0.734375	22	0.328358	14	0.194444	131	0.42671
			Pulse	4	0.5	42	0.47191	4	0.571429	46	0.71875	35	0.522388	23	0.319444	154	0.501629
			BP	4	0.5	38	0.426966	4	0.571429	46	0.71875	38	0.567164	47	0.652778	177	0.576547
			Weight	0	0	17	0.191011	2	0.285714	44	0.6875	29	0.432836	9	0.125	101	0.32899
			Height	0	0	5	0.0561798	1	0.142857	6	0.09375	4	0.0597015	2	0.0277778	18	0.0586319
			MUAC	0	0	1	0.011236	1	0.142857	1	0.015625	2	0.0298507	1	0.0138889	6	0.019544
			Sub-total														0.326954
	Referring health care provider		Name	7	0.875	85	0.955056	7	1	59	0.921875	67	1	69	0.958333	294	0.957655
			Qualification	8	1	87	0.977528	6	0.857143	62	0.96875	61	0.910448	12	0.166667	236	0.76873
			Date / Time	8	1	85	0.955056	7	1	61	0.953125	63	0.940299	70	0.972222	294	0.957655
			Phone	8	1	66	0.741573	5	0.714286	62	0.96875	23	0.343284	10	0.138889	174	0.566775
			Signature / Stamp	8	1	87	0.977528	7	1	63	0.984375	67	1	71	0.986111	303	0.986971
			Sub-total														0.847557
	Referral feedback & Counter referral	Patient	Client name	2	0.25	5	0.0561798	0	0	37	0.578125	21	0.313433	62	0.861111	127	0.413681
			Sex	2	0.25	4	0.0449438	0	0	35	0.546875	5	0.0746269	62	0.861111	108	0.351792
			Age(DOB	2	0.25	3	0.0337079	0	0	35	0.546875	6	0.0895522	62	0.861111	108	0.351792
			Date of admission or client seen at receiving facility	2	0.25	8	0.0898876	0	0	24	0.375	12	0.179104	60	0.833333	106	0.345277
			Date of Discharge	2	0.25	14	0.157303	0	0	21	0.328125	8	0.119403	60	0.833333	105	0.34202
			Final Diagnosis	2	0.25	42	0.47191	0	0	43	0.671875	58	0.865672	71	0.986111	216	0.703583
			Treatment at the receiving facility	2	0.25	31	0.348315	0	0	26	0.40625	46	0.686567	57	0.791667	162	0.527687
			Outcome	2	0.25	11	0.123596	0	0	11	0.171875	9	0.134328	36	0.5	69	0.224756
			Recommendations (follow up care)	1	0.125	16	0.179775	0	0	22	0.34375	4	0.0597015	46	0.638889	89	0.289902
		Refer back to	Name of facility	2	0.25	1	0.011236	0	0	6	0.09375	1	0.0149254	0	0	10	0.0325733
			Contact person	2	0.25	1	0.011236	0	0	2	0.03125	0	0	0	0	5	0.0162866
		Health care provider	Names	2	0.25	43	0.483146	0	0	48	0.75	60	0.895522	62	0.861111	215	0.700326
			Qualification	2	0.25	43	0.483146	0	0	48	0.75	60	0.895522	62	0.861111	215	0.700326
			Date / Time	2	0.25	15	0.168539	0	0	45	0.703125	55	0.820896	64	0.888889	181	0.589577
			Phone	2	0.25	44	0.494382	0	0	49	0.765625	60	0.895522	1	0.0138889	156	0.508143
			Signature / Stamp	2	0.25	43	0.483146	0	0	49	0.765625	61	0.910448	64	0.888889	219	0.713355
		Sub-total															0.425692
		Legend	Abbreviation
			RH = Referral Hospital
			DH = District Hospital
			HC = Health center
			Description
			The above table describe the external referral format completeness assessment whereby column B, C, and D are variables/contents of the external referral letter.
			Row 5 is comprised of number of referral letter assessed per hospital.
			Column E, G, I, K, M, and O caracterise the number or count of YES which determine a completed variable per hospital.
			Column F, H, J, L, N, and P caracterise the percentage of completed variables per hospital.
			Column Q represent the total number of completed variables while column R is the average percentage of completeness with conditional formating colored from green being completed at the maximun lighting up to yellow as the percentage decrease, finally to red representing lower percetange. The subtotal in between represent a groupimg of similar variables which is represented in the manuscript (tabl…

## Sheet: ANC,Delivery,PNC referral form
	Additional file 1 - Sheet 2: Antenatal, Delivery, and Postnatal external transfer form
	Antenatal, Delivery, and Postnatal external transfer form		Health Falicity								Total N=137
			Referral Hospitals				Health Centers
			RH1 N=1		RH2 N= 9		HC3 N=66		HC1 N= 61
			Count	% within Facility	Count	% within Facility	Count	% within Facility	Count	% within Facility	Count	% within Facility
	Patient identification	Client name	1	1	9	1	66	1	61	1	137	1
		SN in register/EMR ID	0	0	0	0	25	0.378788	6	0.0983607	31	0.226277
		Age (DOB)	1	1	9	1	66	1	61	1	137	1
		Next of kin	0	0	0	0	2	0.030303	3	0.0491803	5	0.0364964
		Telephone	1	1	0	0	2	0.030303	3	0.0491803	6	0.0437956
		District	1	1	9	1	65	0.984848	61	1	136	0.992701
		Sector	1	1	9	1	66	1	61	1	137	1
		Cell	1	1	9	1	66	1	61	1	137	1
		Village	1	1	9	1	66	1	61	1	137	1
		Sub-total										0.699919
	Healt details	Date of admission	1	1	9	1	65	0.984848	59	0.967213	134	0.978102
		Date/time of decision to transfer	1	1	9	1	63	0.954545	53	0.868852	126	0.919708
		Receiving facility	1	1	9	1	59	0.893939	56	0.918033	125	0.912409
		Receiving service	1	1	7	0.777778	55	0.833333	55	0.901639	118	0.861314
		Calling time	1	1	1	0.111111	1	0.0151515	6	0.0983607	9	0.0656934
		Staff contacted at receiving facility	1	1	0	0	7	0.106061	0	0	8	0.0583942
		Phone	1	1	0	0	7	0.106061	1	0.0163934	9	0.0656934
		Type of transfer	1	1	9	1	66	1	61	1	137	1
		If emergency	0	0	0	0	1	0.0151515	0	0	1	0.00729927
		Time ambulance called	0	0	0	0	0	0	0	0	0	0
		Time of departure	0	0	0	0	0	0	0	0	0	0
		Copy of partograph attached	0	0	0	0	0	0	1	0.0163934	1	0.00729927
		Type of transportation	0	0	0	0	44	0.666667	46	0.754098	90	0.656934
		Health insurance	1	1	6	0.666667	64	0.969697	52	0.852459	123	0.89781
		Sub-total										0.459333
	Clinical information/Obstetric history	Reason for transfer	1	1	9	1	66	1	61	1	137	1
		Significant findings Clinical presentation	1	1	8	0.888889	65	0.984848	60	0.983607	134	0.978102
		If person with disability, record the type	0	0	0	0	1	0.0151515	2	0.0327869	3	0.0218978
		Gravida	1	1	9	1	65	0.984848	60	0.983607	135	0.985401
		Parity	1	1	9	1	65	0.984848	59	0.967213	134	0.978102
		Living children	0	0	9	1	62	0.939394	53	0.868852	124	0.905109
		Abortion	0	0	9	1	60	0.909091	51	0.836066	120	0.875912
		Stillbirth	0	0	9	1	53	0.80303	49	0.803279	111	0.810219
		Neonatal death	0	0	9	1	54	0.818182	44	0.721311	107	0.781022
		Preterm birth	0	0	6	0.666667	29	0.439394	23	0.377049	58	0.423358
		LMP	1	1	9	1	60	0.909091	57	0.934426	127	0.927007
		EDD	1	1	8	0.888889	60	0.909091	53	0.868852	122	0.890511
		Gestation age	1	1	9	1	34	0.515152	54	0.885246	98	0.715328
		MUAC	0	0	0	0	44	0.666667	11	0.180328	55	0.40146
		Number of ANC completed	1	1	0	0	39	0.590909	5	0.0819672	45	0.328467
		Tetanus vaccines	1	1	0	0	20	0.30303	3	0.0491803	24	0.175182
		Previous significant history	0	0	1	0.111111	14	0.212121	4	0.0655738	19	0.138686
		Multi pregnancy an known HIV	0	0	0	0	8	0.121212	4	0.0655738	12	0.0875912
		Current pregnancy complications	0	0	1	0.111111	10	0.151515	3	0.0491803	14	0.10219
		Latest test results	1	1	2	0.222222	49	0.742424	14	0.229508	66	0.481752
		Sub-total										0.600365
	Maternal vital signs	BP	1	1	9	1	61	0.924242	59	0.967213	130	0.948905
		To	1	1	6	0.666667	52	0.787879	41	0.672131	100	0.729927
		SPO2	1	1	1	0.111111	2	0.030303	3	0.0491803	7	0.0510949
		RR	1	1	6	0.666667	24	0.363636	37	0.606557	68	0.49635
		Pulse	1	1	9	1	61	0.924242	58	0.95082	129	0.941606
		Weight	1	1	5	0.555556	28	0.424242	37	0.606557	71	0.518248
		Height	0	0	0	0	15	0.227273	1	0.0163934	16	0.116788
		Sub-total										0.543274
	Abdominal examination	Fetal presentation	1	1	8	0.888889	63	0.954545	51	0.836066	123	0.89781
		Fundal height	1	1	8	0.888889	59	0.893939	50	0.819672	118	0.861314
		Fetal heart rate	1	1	8	0.888889	58	0.878788	51	0.836066	118	0.861314
		contractions	1	1	7	0.777778	26	0.393939	43	0.704918	77	0.562044
		Sub-total										0.79562
	Vaginal examination	Date / Time latest examination	0	0	2	0.222222	17	0.257576	19	0.311475	38	0.277372
		Dilation	0	0	6	0.666667	31	0.469697	20	0.327869	57	0.416058
		Effacement	0	0	6	0.666667	12	0.181818	16	0.262295	34	0.248175
		Descent	0	0	6	0.666667	14	0.212121	16	0.262295	36	0.262774
		Consistency	0	0	5	0.555556	12	0.181818	4	0.0655738	21	0.153285
		Position	0	0	3	0.333333	11	0.166667	2	0.0327869	16	0.116788
		Caput	0	0	1	0.111111	13	0.19697	7	0.114754	21	0.153285
		Membranes ruptured	0	0	4	0.444444	12	0.181818	17	0.278689	33	0.240876
		If yes date/time	0	0	0	0	0	0	1	0.0163934	1	0.00729927
		Color of amniotic fluid	0	0	0	0	0	0	1	0.0163934	1	0.00729927
		If bloody, estimate blood loss	0	0	0	0	0	0	1	0.0163934	1	0.00729927
		Sub-total										0.171865
	Investigation results	Hgb	1	1	0	0	0	0	1	0.0163934	2	0.0145985
		Urine test	0	0	0	0	0	0	3	0.0491803	3	0.0218978
		Other test	0	0	0	0	0	0	1	0.0163934	1	0.00729927
		Imaging investigation	0	0	0	0	2	0.030303	2	0.0327869	4	0.0291971
		Diagnosis	1	1	5	0.555556	2	0.030303	16	0.262295	24	0.175182
		Procedures	0	0	1	0.111111	1	0.0151515	8	0.131148	10	0.0729927
		Lab test	0	0	0	0	0	0	1	0.0163934	1	0.00729927
		Imaging	0	0	0	0	0	0	0	0	0	0
		Sub-total										0.0410584
	Received treatment at health facility (time given and dose)
	Received treatment at health facility	IV fluids	0	0	0	0	0	0	4	0.0655738	4	0.0291971
		Dexamethasone	0	0	1	0.111111	0	0	0	0	1	0.00729927
		Magnesium sulphate	0	0	0	0	0	0	0	0	0	0
		Nifedipine	0	0	1	0.111111	0	0	1	0.0163934	2	0.0145985
		Oxytocin	0	0	0	0	0	0	0	0	0	0
		ATBs	0	0	0	0	0	0	0	0	0	0
		Others	1	1	0	0	0	0	2	0.0327869	3	0.0218978
		Sub-total										0.0104275
	Referring care provider	Name	1	1	8	0.888889	66	1	51	0.836066	126	0.919708
		Qualification	1	1	9	1	66	1	61	1	137	1
		date	1	1	9	1	66	1	61	1	137	1
		time	1	1	9	1	40	0.606061	55	0.901639	105	0.766423
		Phone	1	1	4	0.444444	65	0.984848	15	0.245902	85	0.620438
		Signature and stamp	1	1	9	1	66	1	61	1	137	1
		Sub-total										0.884428
	Referral feedback/Counter referral
	Referral feedback/Counter referral	Client name	0	0	1	0.111111	49	0.742424	2	0.0327869	52	0.379562
		Sex	0	0	1	0.111111	49	0.742424	1	0.0163934	51	0.372263
		Age(DOB)	0	0	47	0.712121	0	0	1	0.111111	48	0.350365
		Date admission	0	0	44	0.666667	7	0.114754	1	0.111111	52	0.379562
		Date of discharge	0	0	45	0.681818	25	0.409836	2	0.222222	72	0.525547
		Final diagnosis	0	0	63	0.954545	57	0.934426	7	0.777778	127	0.927007
		Treatment at receiving facility	0	0	43	0.651515	44	0.721311	6	0.666667	93	0.678832
		Outcome	0	0	9	0.136364	28	0.459016	3	0.333333	40	0.291971
		Recommendations	0	0	38	0.575758	28	0.459016	6	0.666667	72	0.525547
		Name of the facility	0	0	1	0.0151515	0	0	1	0.111111	2	0.0145985
		Contact person	0	0	0	0	0	0	1	0.111111	1	0.00729927
		Name	0	0	59	0.893939	60	0.983607	8	0.888889	127	0.927007
		Qualification	0	0	59	0.893939	60	0.983607	8	0.888889	127	0.927007
		Date	0	0	58	0.878788	31	0.508197	4	0.444444	93	0.678832
		Time	0	0	17	0.257576	26	0.42623	4	0.444444	47	0.343066
		Phone	0	0	59	0.893939	59	0.967213	8	0.888889	126	0.919708
		Signature and stamp	0	0	59	0.893939	59	0.967213	8	0.888889	126	0.919708
		Sub-total										0.539287
	Legend	Abbreviation
		RH = Referral Hospital
		HC = Health center
		Description
		The above table describe the Antenatal, Delivery, and Postnatal external transfer form completeness assessment whereby column B and C are variables/contents of the Antenatal, Delivery, and Postnatal external transfer form.
		Row 5 is comprised of number of referral letter assessed per hospital.
		Column D, F, H, and J caracterise the number or count of YES which determine a completed variable per hospital.
		Column E, G, I, and K caracterise the percentage of completed variables per hospital.
		Column L represent the total number of completed variables while column M is the average percentage of completeness with conditional formating colored from green being completed at the maximun lighting up to yellow as the percentage decrease, finally to red representing lower percetange. The subtotal in between represent a groupimg of similar variables which is represented in the manuscript (tabl…

## Sheet: Fiche de reference RF
		Additional file 1 - Sheet 3: Fiche de référence / Contre référence
	FICHE DE REFERENCE / CONTRE REFERENCE		Health Falicity												Total N=840
			Referral Hospitals				Dictrict Hospitals				Health Centers
			RH1 N=202		RH2 N= 90		DH1 N=160		DH3 N=240		HC3 N=114		HC1 N= 32
			Count	% within Facility	Count	% within Facility	Count	% within Facility	Count	% within Facility	Count	% within Facility	Count	% within Facility	Count	% within Facility
	Patient Identification	Nom	202	1	90	1	160	1	240	0.991736	114	1	32	1	838	0.997619
		Prenom	202	1	90	1	160	1	237	0.979339	114	1	32	1	835	0.994048
		Age	201	0.99505	89	0.988889	153	0.95625	231	0.954545	114	1	32	1	820	0.97619
		Sexe	200	0.990099	88	0.977778	155	0.96875	234	0.966942	113	0.991228	32	1	822	0.978571
		No du Dossier	105	0.519802	11	0.122222	0	0	0	0	7	0.0614035	0	0	123	0.146429
		District	74	0.366337	44	0.488889	49	0.30625	131	0.541322	113	0.991228	31	0.96875	442	0.52619
		Secteur	73	0.361386	33	0.366667	47	0.29375	108	0.446281	113	0.991228	32	1	406	0.483333
		Cellule	62	0.306931	18	0.2	45	0.28125	101	0.417355	111	0.973684	32	1	369	0.439286
		Village	59	0.292079	15	0.166667	45	0.28125	101	0.417355	101	0.885965	32	1	353	0.420238
		Sub-total														0.662434
	Clinical Information	Anamnese et examen clinique	198	0.980198	90	1	160	1	242	1	111	0.973684	32	1	833	0.991667
		Examens complementaires	126	0.623762	50	0.555556	128	0.8	115	0.475207	70	0.614035	12	0.375	501	0.596429
		traitement recu	95	0.470297	35	0.388889	118	0.7375	88	0.363636	60	0.526316	11	0.34375	407	0.484524
		Raison de transfer	202	1	90	1	160	1	242	1	114	1	29	0.90625	837	0.996429
		Sub-total														0.767262
	Referring Healthcare provider details	Nom et signature du referrant	202	1	90	1	160	1	242	1	114	1	32	1	840	1
		Date	202	1	90	1	160	1	242	1	114	1	32	1	840	1
		Sub-total														1
	Contre Reference	Contre Reference
		Date entrée	14	0.0693069	0	0	4	0.025	0	0	0	0	4	0.125	22	0.0261905
		Date sortie	13	0.0643564	0	0	3	0.01875	0	0	0	0	3	0.09375	19	0.022619
		Resultats significatifs	14	0.0693069	1	0.0111111	1	0.00625	0	0	0	0	5	0.15625	21	0.025
		Diagnostics	12	0.0594059	1	0.0111111	6	0.0375	0	0	0	0	26	0.8125	45	0.0535714
		Traitement recu et /ou intervention subie	12	0.0594059	1	0.0111111	4	0.025	0	0	0	0	17	0.53125	34	0.0404762
		Recommendations / traitement a suivre	13	0.0643564	1	0.0111111	4	0.025	0	0	0	0	19	0.59375	37	0.0440476
		Nom et signature du contre referrant	14	0.0693069	1	0.0111111	6	0.0375	0	0	0	0	32	1	53	0.0630952
		Sub-total														0.0392857
	Legend	Abbreviation
		RH = Referral Hospital
		DH = District Hospital
		HC = Health center
		Description
		The above table describe the Fiche de référence / Contre référence completeness assessment whereby column B and C are variables/contents of the Fiche de référence / Contre référence.
		Row 6 is comprised of number of referral letter assessed per hospital.
		Column D, F, H, J, L, and N caracterise the number or count of YES which determine a completed variable per hospital.
		Column E, G, I, K, M, and O caracterise the percentage of completed variables per hospital.
		Column P represent the total number of completed variables while column Q is the average percentage of completeness with conditional formating colored from green being completed at the maximun lighting up to yellow as the percentage decrease, finally to red representing lower percetange. The subtotal in between represent a groupimg of similar variables which is represented in the manuscript (tabl…

## Sheet: Internal referral form
		Additional file 1 - Sheet 4: Internal referral form
	INTERNAL TRANSFER FORM		Referral Hospitals				Dictrict Hospital		Total N=79
			RH1 N=48		RH2 N= 21		DH1 N=10
			Count	% within Facility	Count	% within Facility	Count	% within Facility	Count	% within Facility
	Client identification	Client Name	48	1	21	1	10	1	79	1
		Age (DOB)	48	1	21	1	10	1	79	1
		Sex	48	1	16	0.761905	10	1	74	0.936709
		Patient file Number/EMR ID	43	0.895833	7	0.333333	0	0	50	0.632911
		Name of next of kin	1	0.0208333	0	0	0	0	1	0.0126582
		Telephone	0	0	0	0	0	0	0	0
		District	0	0	0	0	0	0	0	0
		Sector	0	0	0	0	0	0	0	0
		Cell	0	0	0	0	0	0	0	0
		Village	0	0	0	0	0	0	0	0
		Sub-total								0.358228
	Transfer details	Date and time of decision to transfer: Date	46	0.958333	1	0.047619	10	1	57	0.721519
		Time	34	0.708333	0	0	0	0	34	0.43038
		Referring service	48	1	13	0.619048	10	1	71	0.898734
		Receiving service	46	0.958333	14	0.666667	10	1	70	0.886076
		Staff contacted	8	0.166667	0	0	0	0	8	0.101266
		Phone	7	0.145833	0	0	0	0	7	0.0886076
		Sub-total								0.521097
	Clinical Information	Reason for Transfer	48	1	20	0.952381	10	1	78	0.987342
		Significant Findings	1	0.0208333	14	0.666667	10	1	25	0.316456
		Clinical condition prior to transfer	41	0.854167	18	0.857143	8	0.8	67	0.848101
		If person with disability, record the type of disability	0	0	0	0	0	0	0	0
		Diagnosis	45	0.9375	2	0.0952381	8	0.8	55	0.696203
		Ongoing Treatments	39	0.8125	0	0	3	0.3	42	0.531646
		Sub-total								0.563291
	Referring health care provider	Name	48	1	7	0.333333	10	1	65	0.822785
		Date	47	0.979167	7	0.333333	10	1	64	0.810127
		Time	32	0.666667	1	0.047619	0	0	33	0.417722
		Phone	47	0.979167	7	0.333333	10	1	64	0.810127
		Signature and stamp	46	0.958333	7	0.333333	10	1	63	0.797468
		Sub-total								0.731646
	Receiving health care provider	Name	0	0	15	0.714286	0	0	15	0.189873
		Date	0	0	15	0.714286	0	0	15	0.189873
		Time	0	0	2	0.0952381	0	0	2	0.0253165
		Phone	0	0	15	0.714286	0	0	15	0.189873
		Signature and stamp	0	0	15	0.714286	0	0	15	0.189873
		Sub-total								0.156962
	Legend	Abbreviation
		RH = Referral Hospital
		DH = District Hospital
		Description
		The above table describe the Internal referral form completeness assessment whereby column B and C are variables/contents of the Internal referral form.
		Row 5 is comprised of number of referral letter assessed per hospital.
		Column D, F, and H caracterise the number or count of YES which determine a completed variable per hospital.
		Column E, G, and I caracterise the percentage of completed variables per hospital.
		Column J represent the total number of completed variables while column K is the average percentage of completeness with conditional formating colored from green being completed at the maximun lighting up to yellow as the percentage decrease, finally to red representing lower percetange. The subtotal in between represent a groupimg of similar variables which is represented in the manuscript as su…

## Sheet: PH2
		Additional file 1 - Sheet 5: Private Hospital PH2
	Private hospital (PH2)		Facility		Total
			PH2
			Count	% within Facility	Count	% within Facility
	Patient Identification	Nom du malade	216	0.995392	216	0.995392
		Age	211	0.97235	211	0.97235
		Sexe	214	0.986175	214	0.986175
		Adresse	128	0.589862	128	0.589862
		Sub-total				0.885945
	Transfer details	Elements cliniques paraclinique et diagnostic de presomption	217	1	217	1
		Prise an charge avant le transfer	181	0.834101	181	0.834101
		Motif de transfer et destination	216	0.995392	216	0.995392
		Sub-total				0.943164
	Referring Healthcare Provider	Date	217	1	217	1
		Nom et signature du referrant	217	1	217	1
		Sub-total				1
	Counter referral	Retro information Date	0	0	0	0
		Retro information Nom et signature	0	0	0	0
		Sub-total				0
	Legend	Abbreviation
		PH = Private Hospital
		Description
		The above table describe the private hospital PH2 form completeness assessment whereby column B and C are variables/contents of the private hospital PH2 form.
		Column D caracterise the number or count of YES which determine a completed variable in hospital PH2.
		Column E caracterise the percentage of completed variables in the hospital PH2.
		Column F represent the total number of completed variables while column G is the average percentage of completeness with conditional formating colored from green being completed at the maximun lighting up to yellow as the percentage decrease, finally to red representing lower percetange. The subtotal in between represent a groupimg of similar variables which is represented in the manuscript (tabl…

## Sheet: PH1
		Additional file 1 - Sheet 6: Private Hospital PH1
	Private Hospital (PH1)			Facility		Total
				PH1
				Count	% within Facility	Count	% within Facility
	Patient Identification	Patient name		575	1	575	1
		Age		571	0.993043	571	0.993043
		Sex		575	1	575	1
		Sub-total					0.997681
	Clinical Information	Clinical Status		575	1	575	1
		Received treatments		569	0.989565	569	0.989565
		Transfer Reason(s)		434	0.754783	434	0.754783
		Transfer to		575	1	575	1
		Sub-total					0.936
	Referring Healthcare Provider	Prepared by		569	0.989565	569	0.989565
		Approved by		575	1	575	1
		Kigali on		575	1	575	1
		Signature		575	1	575	1
		Sub-total					0.997391
	Legend	Abbreviation
		PH = Private Hospital
		Description
		The above table describe the private hospital PH1 form completeness assessment whereby column B, C and D are variables/contents of the private hospital PH1 form.
		Column E caracterise the number or count of YES which determine a completed variable in hospital PH1.
		Column F caracterise the percentage of completed variables in the hospital PH1.
		Column G represent the total number of completed variables while column H is the average percentage of completeness with conditional formating colored from green being completed at the maximun lighting up to yellow as the percentage decrease, finally to red representing lower percetange. The subtotal in between represent a groupimg of similar variables which is represented in the manuscript (tabl…

## Sheet: DH2
		Additional file 1 - Sheet 7: District Hospital DH2
	District Hospital (DH2)		Facility		Total
			DH2
			Count	% within Facility	Count	% within Facility
	Patient Identification	Client name	146	1	146	1
		Age(DoB)	149	1	149	1
		Sex	148	0.993289	148	0.993289
		Sub-total				0.997763
	Transfer Details	Significant Findings	147	0.986577	147	0.986577
		Procedure and treatment	63	0.422819	63	0.422819
		Patient immediate condition	127	0.852349	127	0.852349
		Reason for referral/transfer	149	1	149	1
		Sub-total				0.815436
	Clinical Information	Service	149	1	149	1
		Hospital	149	1	149	1
		Type of transportation and required monitoring during transport	74	0.496644	74	0.496644
		Date	148	0.993289	148	0.993289
		Sub-total				0.872483
	Referring health care provider		147	0.986577	147	0.986577
	Counter referral		0	0	0	0
	Legend	Abbreviation
		DH = District Hospital
		Description
		The above table describe the district hospital DH2 form completeness assessment whereby column B and C are variables/contents of the district hospital DH2 form.
		Column D caracterise the number or count of YES which determine a completed variable in hospital DH2.
		Column E caracterise the percentage of completed variables in the hospital DH2.
		Column F represent the total number of completed variables while column G is the average percentage of completeness with conditional formating colored from green being completed at the maximun lighting up to yellow as the percentage decrease, finally to red representing lower percetange. The subtotal in between represent a groupimg of similar variables which is represented in the manuscript (tabl…
